# Supplementary figures and images for: Baseline neutrophil-to-lymphocyte ratio is associated with outcome of ipilimumab-treated metastatic melanoma patients
Source: PubMed Central journal article supplement — Br J Cancer. 2015 May 26;112(12):1904–10. doi: 10.1038/bjc.2015.180 (PMC4580390; doi:10.1038/bjc.2015.180), 2015-05-26

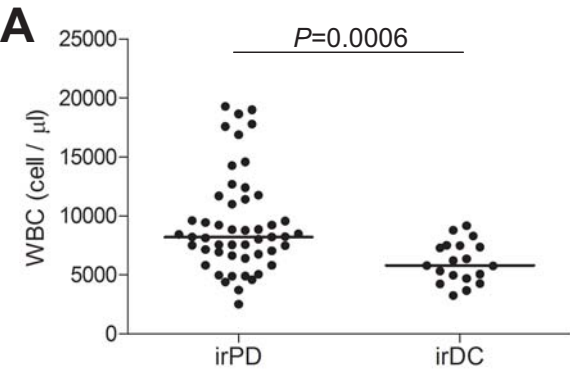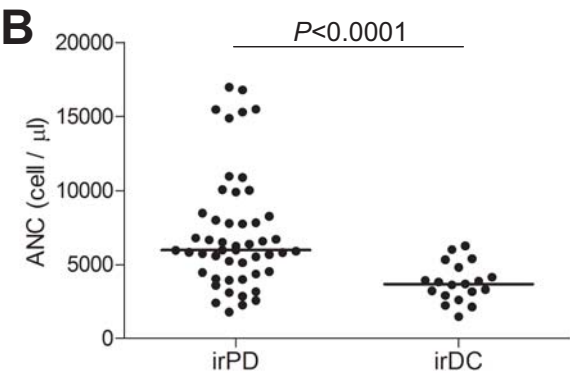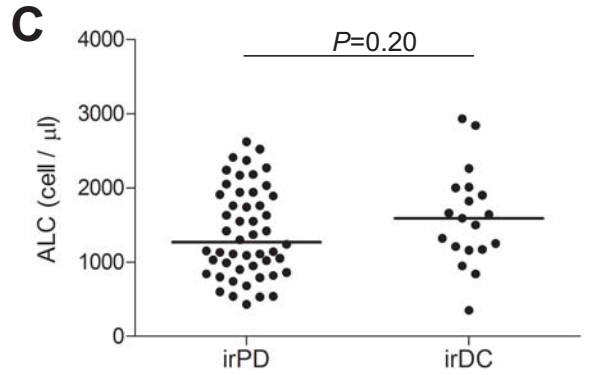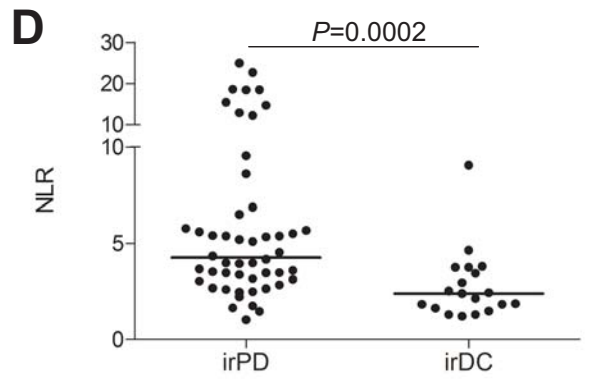

Supplement: bjc2015180x1.pdf [file bjc2015180x1.pdf]
